# Supplementary material for: Does the Harvest Type Affect Olive Health? Influence of the Harvesting System and Storage Time on the Chemical, Volatile and Sensory Qualities of Extra Virgin Olive Oils
Source: MDPI journal article supplement (doi:10.3390/plants12223843), 2023-11-14
Supplement: s1 [file s1]

## Supplementary Material

**Table S1. SM1-** Volatile organic compounds detected from olive fruit and olive oil respectively.

| Signals number | m/z    | Chemical Formula | Tentative identification           | Olive fruits | Olive oils |
|----------------|--------|------------------|------------------------------------|--------------|------------|
| 1              | 27.022 | C2H3+            | Acetylene                          | X            | X          |
| 2              | 31.018 | CH3O+            | Formaldehyde                       | X            | X          |
| 3              | 33.031 | CH5O+            | Methanol                           | X            | X          |
| 4              | 41.038 | C3H5+            | Alkyl fragment                     | X            | X          |
| 5              | 43.018 | C2H3O+           | Alkyl fragment (ethenone)          | X            | X          |
| 6              | 43.054 | C3H7+            | Hydrocarbon fragments              | X            | X          |
| 7              | 45.033 | C2H5O+           | Acetaldehyde                       | X            | X          |
| 8              | 47.049 | C2H7O+           | Ethanol                            | X            | X          |
| 9              | 51.038 | CH7O2+           | Water-methanol                     | X            | -          |
| 10             | 53.038 | C4H5+            | Cyclobutadiene                     | X            | X          |
| 11             | 55.054 | C4H7+            | Alkyl fragment                     | X            | X          |
| 12             | 57.033 | C3H5O+           | 2-Propenal                         | X            | X          |
| 13             | 57.069 | C4H9+            | 1-Butene (alkyl fragment)          | X            | -          |
| 14             | 59.049 | C3H7O+           | 2-Propanone (acetone)              | X            | X          |
| 15             | 61.028 | C2H5O2+          | Acetic acid                        | X            | X          |
| 16             | 65.038 | C5H5+            | Alkyl fragment                     | X            | -          |
| 17             | 67.049 | C5H7+            | 3-Penten-1-yne                     | X            | X          |
| 18             | 69.069 | C5H9+            | 2-Methyl-1,3-butadiene (isoprene)  | X            | X          |
| 19             | 71.049 | C4H7O+           | 3-Buten-2-one                      | X            | X          |
| 20             | 71.086 | C5H11+           | Alkyl fragment (several compounds) | X            | X          |
| 21             | 73.065 | C4H9O+           | 2-Butanone                         | X            | X          |
| 22             | 75.044 | C3H7O2+          | Methyl acetate                     | X            | X          |
| 23             | 77.038 | C6H5+            | Alkyl fragment                     | X            | X          |
| 24             | 79.049 | C6H7+            | Benzene                            | X            | X          |
| 25             | 81.069 | C6H9+            | C6 fragments                       | X            | X          |
| 26             | 83.086 | C6H11+           | C6 fragments                       | X            | X          |
| 27             | 87.080 | C5H11O+          | 2-Methylbutanal                    | X            | X          |
| 28             | 89.059 | C4H9O2+          | Ethyl acetate                      | -            | X          |
| 29             | 91.040 | C7H7+            | Alkyl fragment (several compounds) | -            | X          |
| 30             | 93.069 | C7H9+            | Terpene fragments                  | -            | X          |
| 31             | 95.086 | C6H7O+           | C6 fragments                       | X            | X          |

|                               |         |          |                          |    |    |
|-------------------------------|---------|----------|--------------------------|----|----|
| 32                            | 97.064  | C6H9O+   | Dimethylfuran            | X  | X  |
| 33                            | 99.080  | C6H11O+  | Hexenal/methyl-pentenone | X  | X  |
| 34                            | 101.060 | C5H9O2+  | 2,3-Pentanedione         | X  | X  |
| 35                            | 105.069 | C8H9+    | Styrene                  | -  | X  |
| 36                            | 107.086 | C8H11+   | Ethyl benzene            | -  | X  |
| 37                            | 115.075 | C5H11O2+ | Terpene fragments        | X  | X  |
| 38                            | 121.101 | C9H13+   | Terpene fragments        | -  | X  |
| 39                            | 135.117 | C10H15+  | p-Cymene                 | -  | X  |
| Number of total VOCs detected |         |          |                          | 32 | 36 |
